# Supplementary material for: Anti-Inflammatory Klotho Protein Serum Concentration Correlates with Interferon Gamma Expression Related to the Cellular Activity of Both NKT-like and T Cells in the Process of Human Aging
Source: MDPI journal article supplement (doi:10.3390/ijms24098393), 2023-05-07
Supplement: s1 [file s1]

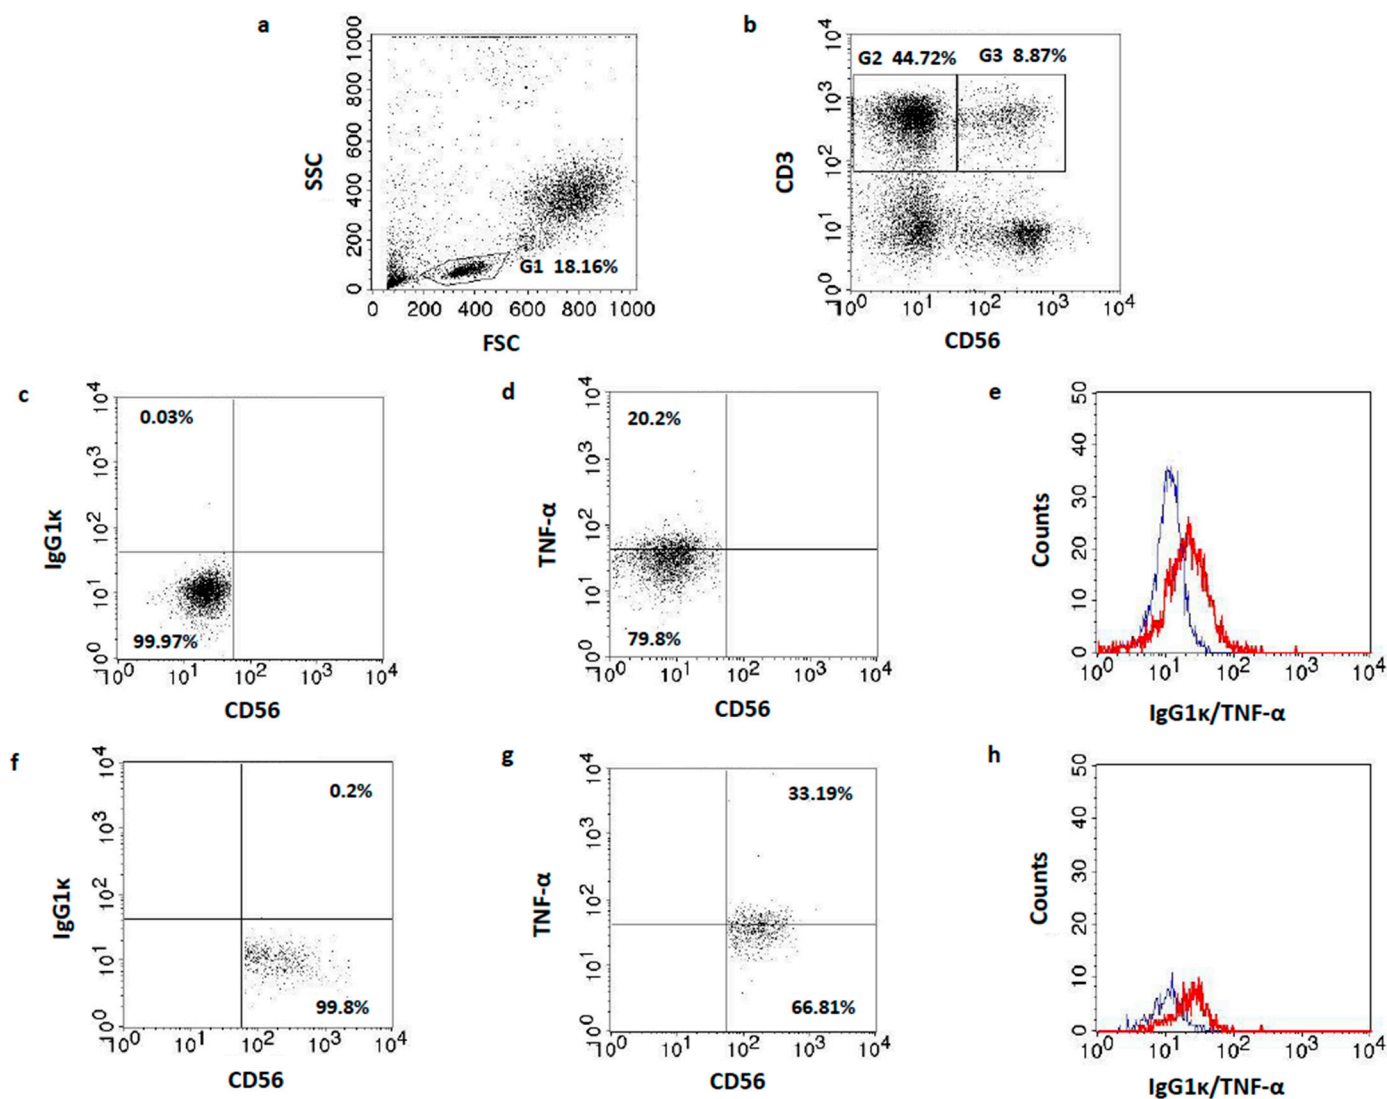

**Figure S1.** Gating strategy performed for flow cytometric analysis of T lymphocytes (CD3+ cells) and NKT-like cells (CD3+CD56+ cells) from whole blood samples. **(a)** Lymphocyte gating – lymphocytes were defined as FSC<sub>low</sub>/SSC<sub>low</sub> cells (G1). **(b)** T and NKT-like cell gating – T lymphocytes were defined as CD3+ positive population (G2), and NKT-like cells were defined as CD3+CD56+ positive cells (G3). **(c)** Isotype control for TNF-α positive T cells. **(d)** T cells expressing TNF-α were identified in the upper left quadrant. **(e)** TNF-α expression (red line) vs isotype control (blue line) presented in T cells. **(f)** Isotype control for TNF-α -positive NKT-like cells. **(g)** NKT-like cells expressing TNF-α were identified in the upper right quadrant. **(h)** TNF-α expression (red line) vs isotype control (blue line) presented in NKT-like cells. The analysis of IL-6 and IFN-γ expression was performed in the same way. All age groups were analyzed with the same gating strategy.

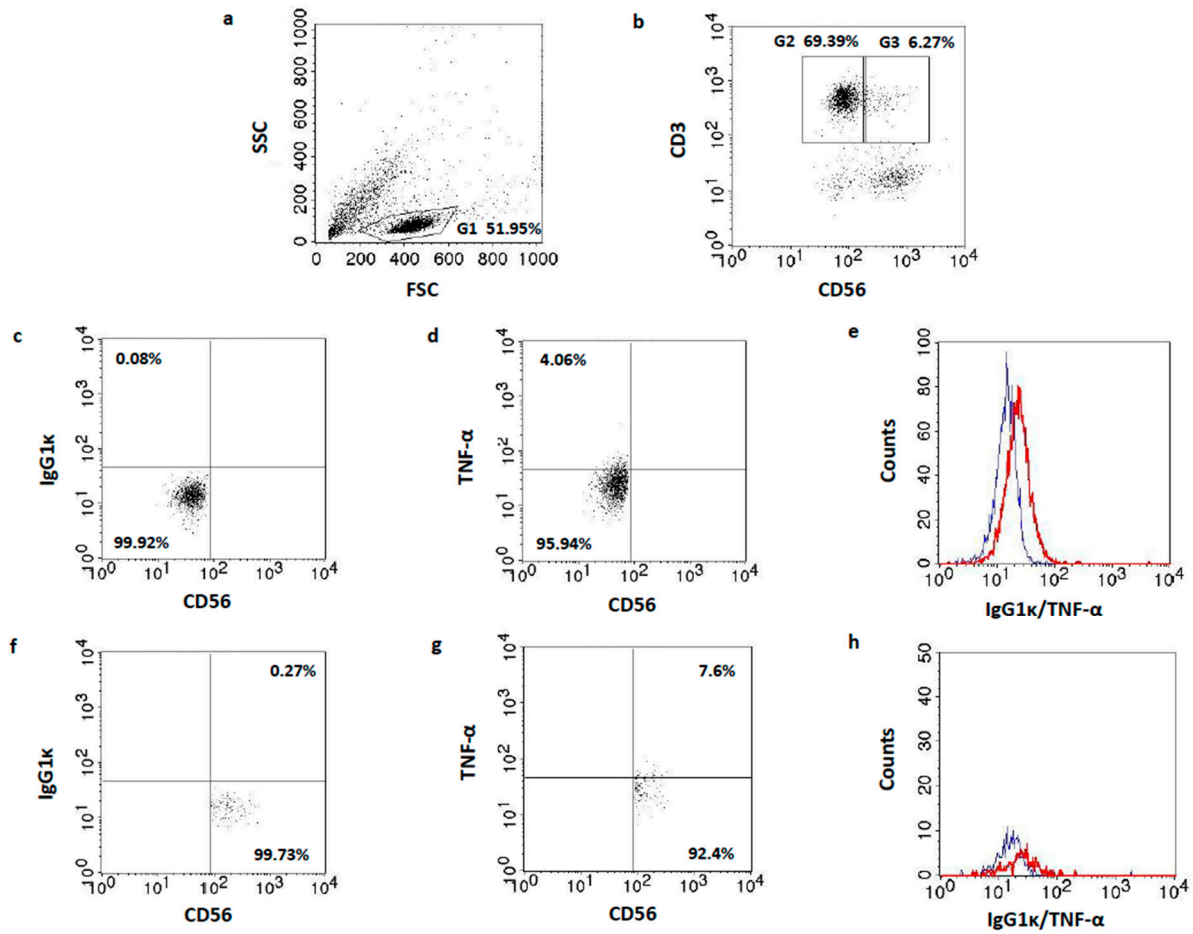

**Figure S2.** Gating strategy performed for flow cytometric analysis of T lymphocytes (CD3+ cells) and NKT-like cells (CD3+CD56+ cells) from PBMC cultures. **(a)** Lymphocyte gating in the population of PBMCs – lymphocytes were defined as FSC<sub>low</sub>/SSC<sub>low</sub> cells (G1). **(b)** T and NKT-like cell gating – T lymphocytes were defined as CD3+ positive population (G2), and NKT-like cells were defined as CD3+CD56+ positive cells (G3). **(c)** Isotype control for TNF- $\alpha$ -positive T cells. **(d)** T cells expressing TNF- $\alpha$  were identified in the upper left quadrant. **(e)** TNF- $\alpha$  expression (red line) vs isotype control (blue line) presented in T cells. **(f)** Isotype control for TNF- $\alpha$ -positive NKT-like cells. **(g)** NKT-like cells expressing TNF- $\alpha$  were identified in the upper right quadrant. **(h)** TNF- $\alpha$  expression (red line) vs isotype control (blue line) presented in NKT-like cells. The analysis of IL-6 and IFN- $\gamma$  expression was performed in the same way. All age groups were analyzed with the same gating strategy.

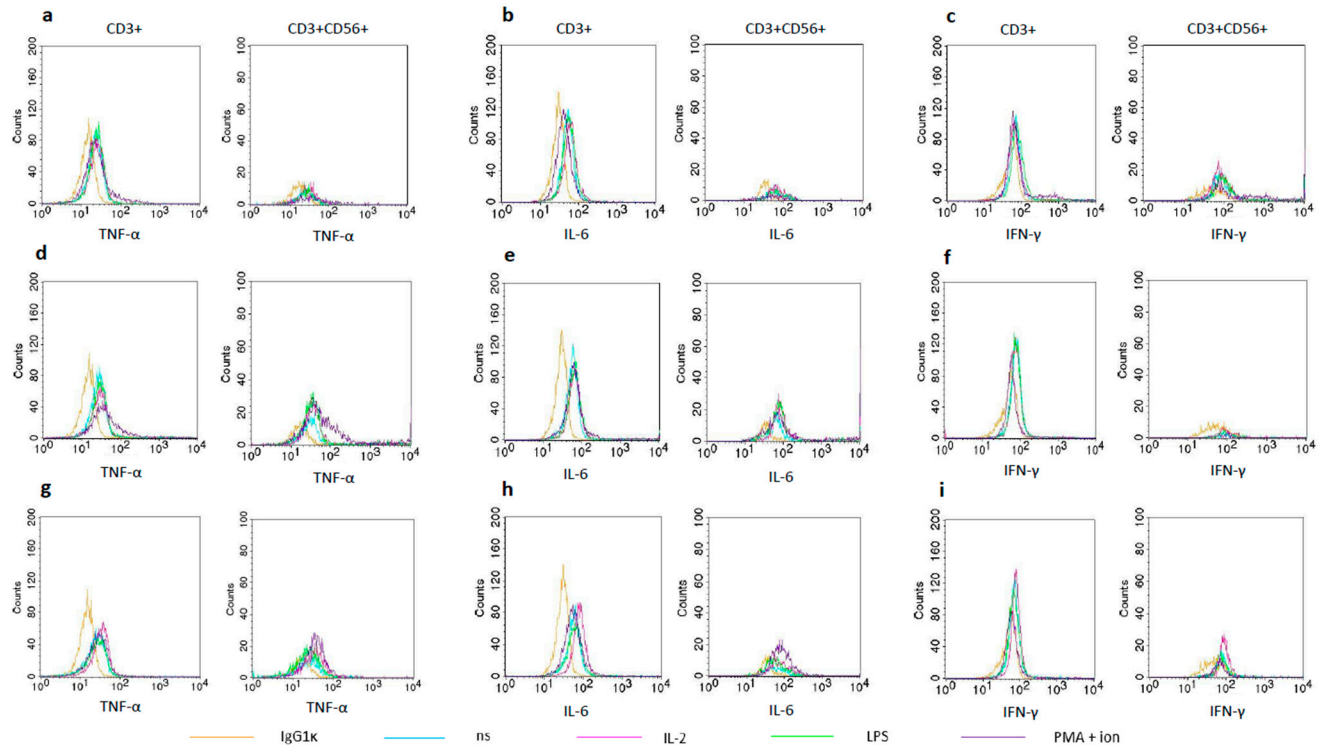

**Figure S3.** FACS histogram overlay plots for TNF- $\alpha$ , IL-6 and IFN- $\gamma$  expression in CD3+ and CD3+CD56+ cells presented in the representative samples of the young, old and the oldest group. Each plot shows overlay graphs depicting isotype control (IgG1k – orange line), unstimulated cells (ns – light blue line), cells stimulated with IL-2 (IL-2 – pink line), cells stimulated with LPS (LPS – light green line) and cells treated with PMA and ionomycin (PMA + ion – dark purple line). (a) TNF- $\alpha$  expression in CD3+ cells (left) and CD3+CD56+ cells (right) of the young. (b) IL-6 expression in CD3+ cells (left) and CD3+CD56+ cells (right) of the young. (c) IFN- $\gamma$  expression in CD3+ cells (left) and CD3+CD56+ cells (right) of the young. (d) TNF- $\alpha$  expression in CD3+ cells (left) and CD3+CD56+ cells (right) of the old. (e) IL-6 expression in CD3+ cells (left) and CD3+CD56+ cells (right) of the old. (f) IFN- $\gamma$  expression in CD3+ cells (left) and CD3+CD56+ cells (right) of the old. (g) TNF- $\alpha$  expression in CD3+ cells (left) and CD3+CD56+ cells (right) of the oldest. (h) IL-6 expression in CD3+ cells (left) and CD3+CD56+ cells (right) of the oldest. (i) IFN- $\gamma$  expression in CD3+ cells (left) and CD3+CD56+ cells (right) of the oldest.

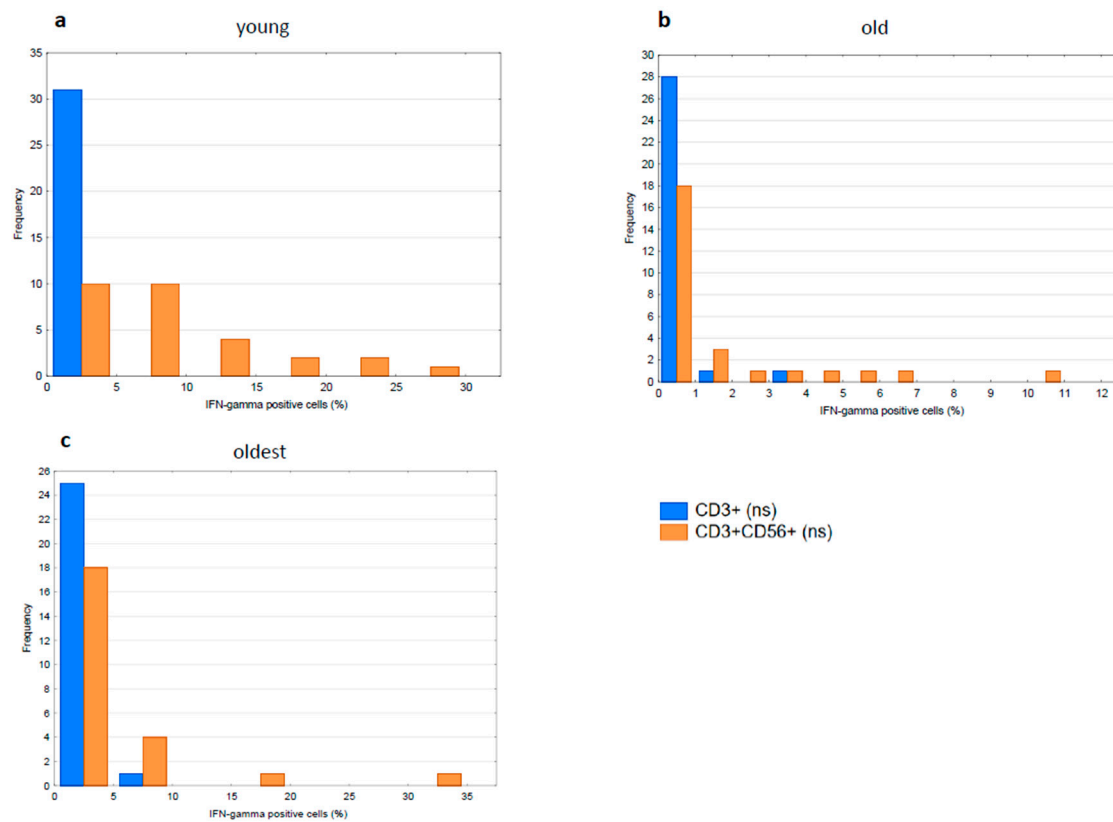

**Figure S4.** Frequency of samples differing in IFN- $\gamma$  expression in the population of unstimulated (ns) CD3+ cells (blue color) and CD3+CD56+ cells (orange color) analysed in the group of the young (a), old (b) and the oldest (c).

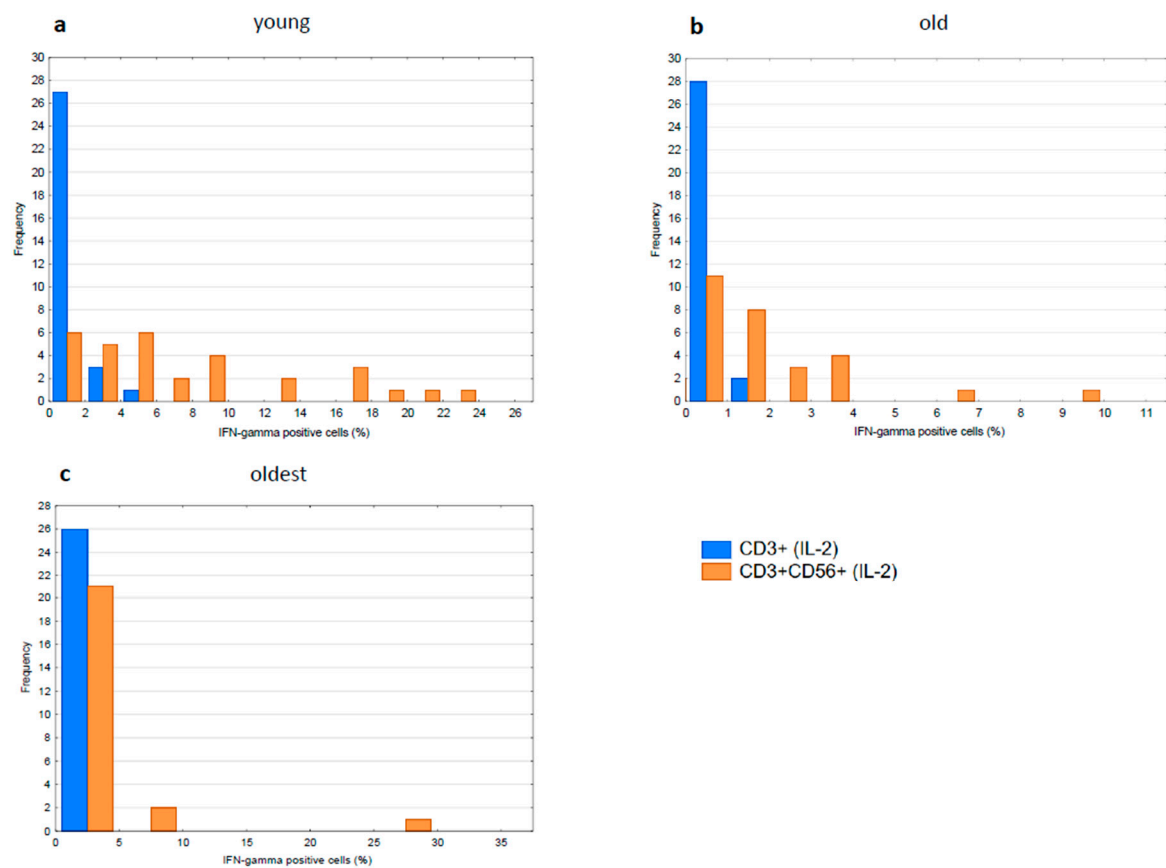

**Figure S5.** Frequency of samples differing in IFN- $\gamma$  expression in the population of CD3+ cells (blue color) and CD3+CD56+ cells (orange color) stimulated with IL-2 analysed in the group of the young (a), old (b) and the oldest (c).

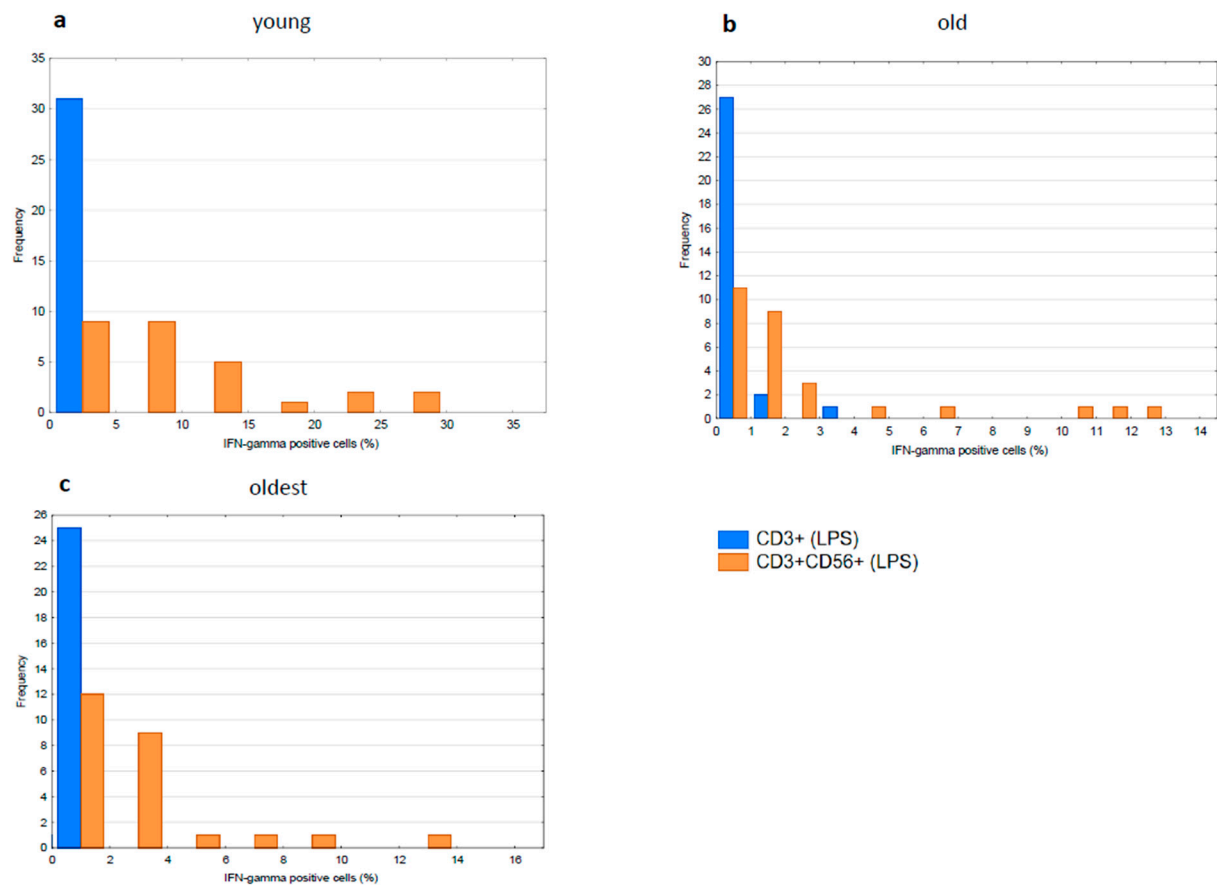

**Figure S6.** Frequency of samples differing in IFN- $\gamma$  expression in the population of CD3+ cells (blue color) and CD3+CD56+ cells (orange color) stimulated with LPS analysed in the group of the young (a), old (b) and the oldest (c).

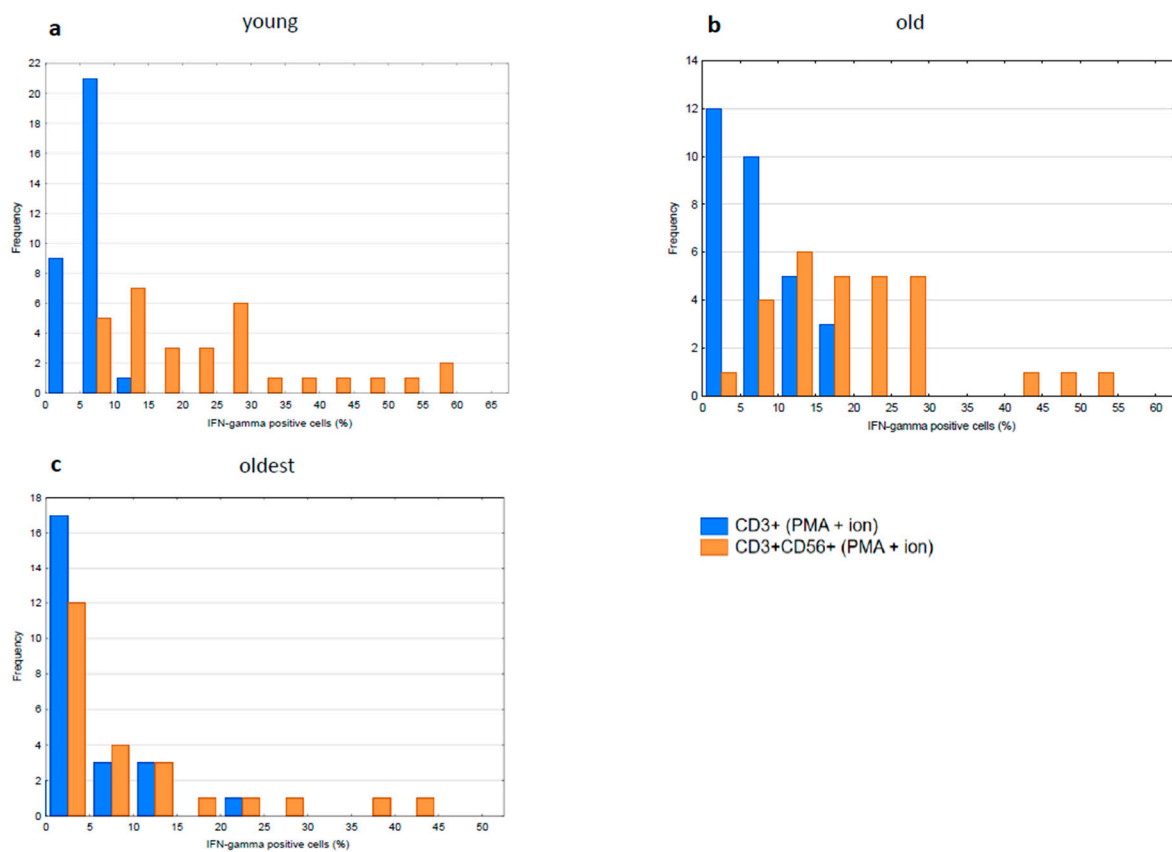

**Figure S7.** Frequency of samples differing in IFN- $\gamma$  expression in the population of CD3+ cells (blue color) and CD3+CD56+ cells (orange color) stimulated with PMA and ionomycin analysed in the group of the young (a), old (b) and the oldest (c).
